# Supplementary material
Source: PubMed Central journal article supplement (PMC3957693)
Supplement: JB.01365-13_zjb999093052so1.pdf [file JB.01365-13_zjb999093052so1.pdf]

1

### Supplemental Materials

A.

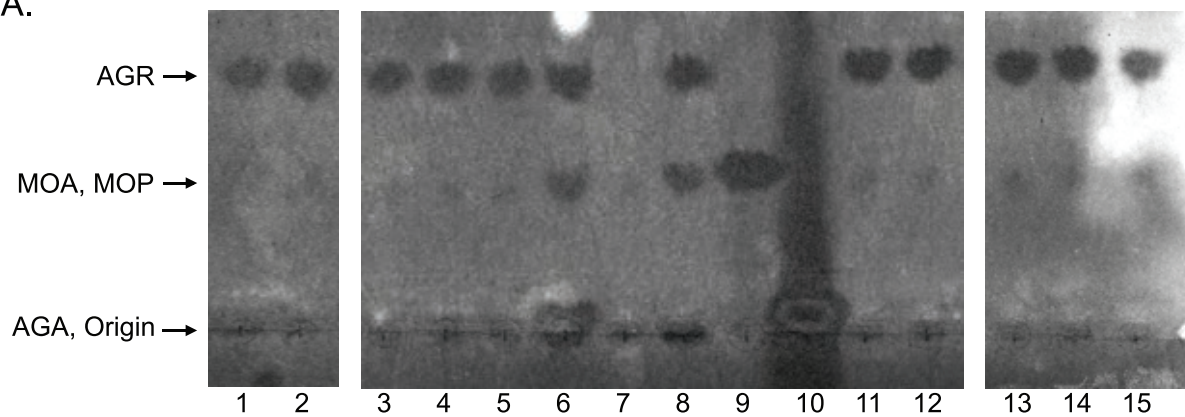

B.

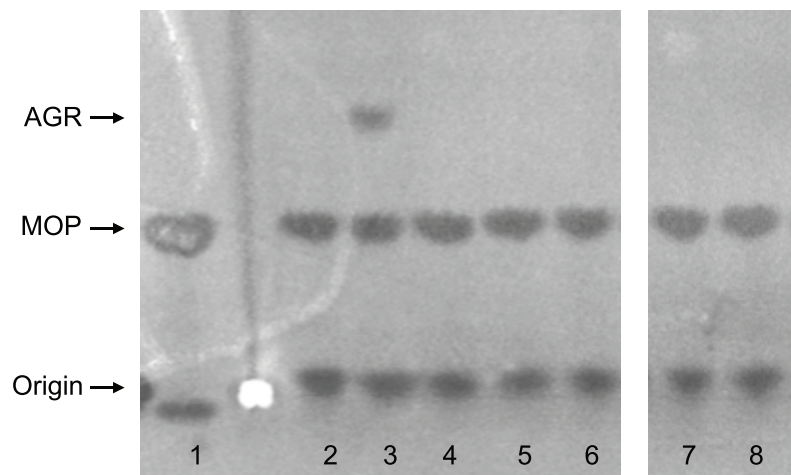

2

3

4 **Figure S1. A.** The Corvallis isolates and their transformants can utilize MOP, MOA and AGA  
5 but not AGR. **A.** Strains were cultured in AB minimal medium supplemented with extracts from  
6 tumors induced by strain 15955. Following growth, the cells were removed and the culture  
7 supernatants were analyzed for the mannityl opines by high voltage paper electrophoresis  
8 (HVPE) all as described in Materials and Methods. Supernatants are from cultures of 1, F64/95;  
9 2, F265/93; 3, J62/95; 4, J84/95; 5, M200/94; 6, Uninoculated; 7, 15955; 8, NTL6; 11,  
10 NTL6(pAoF64/95); 12, NTL6(pAoF265/93); 13, NTL6(pAoJ62/95); 14, NTL6(pAoJ85/95); 15,  
11 NTL6(pAoM200/94). Lanes 9 and 10 contain mannopine and fructose standards respectively.  
12 **B.** The Corvallis isolates were analyzed for MOP cyclase activity as described in Materials and  
13 Methods. Opines were separated by HVPE and visualized using an alkaline silver nitrate stain.  
14 Lanes contain the reaction products from incubation with: 2, NTL4(pTiC58); 3, 15955; 4,  
15 M200/94; 5, J84/95; 6, J62/95; 7, F265/93; and 8, F64/95. Lane 1 contains a MOP standard.  
16

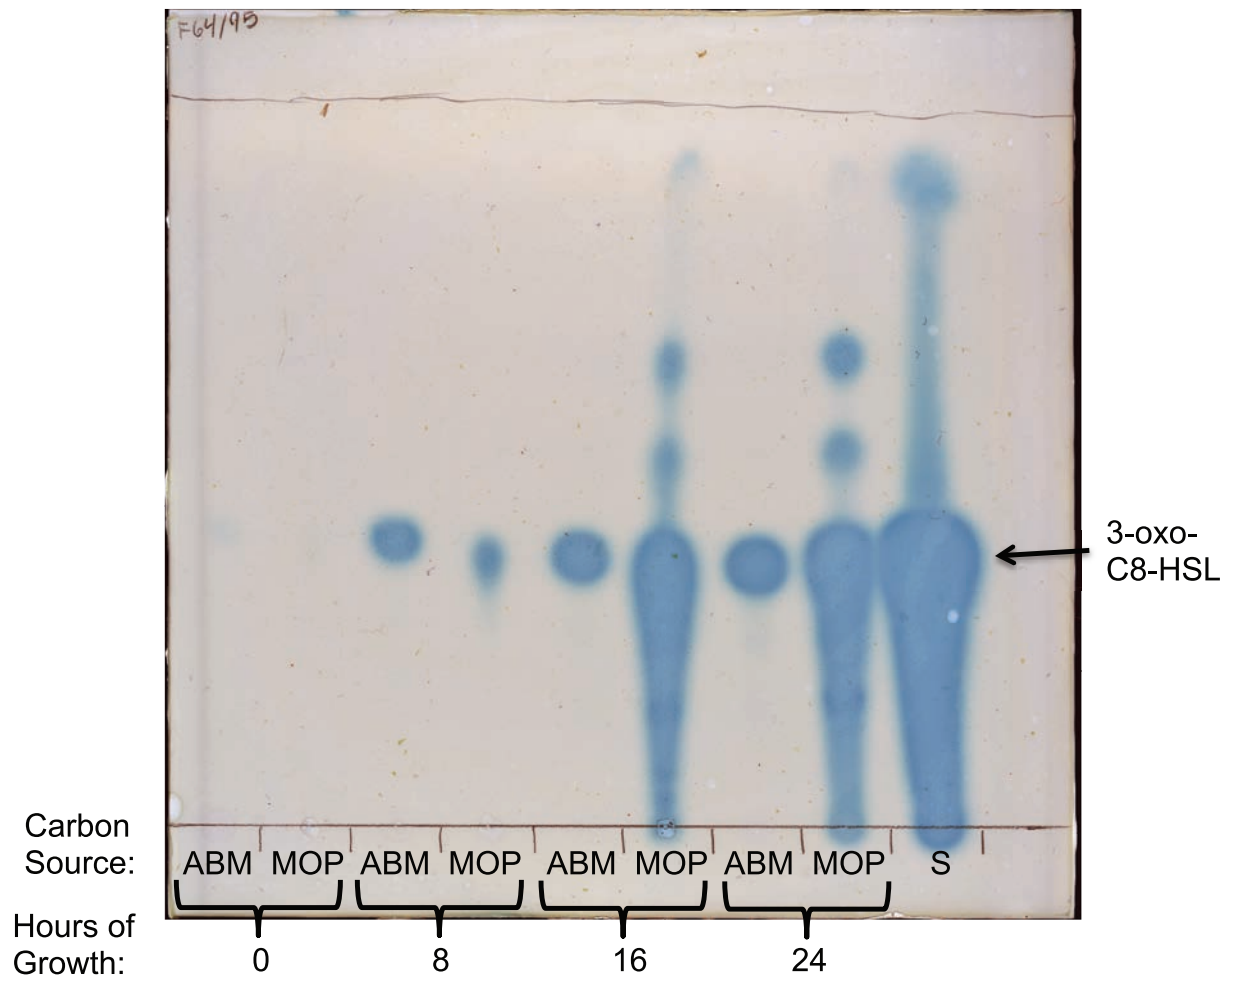

17

18

19 **Figure S2.** Production of AAI by F64/95 is induced by growth with MOP. Cultures grown in  
 20 AB minimal medium supplemented with 0.005% yeast extract and either mannitol (ABM) or  
 21 mannopine (MOP) as the primary carbon source were sampled approximately every eight hours  
 22 for 24 hours. Samples of each culture were extracted with ethyl acetate, and the extracts were  
 23 assayed for acyl-HSLs by thin layer chromatography as described in Material and Methods. S,  
 24 Authentic N-3-oxo-octanoly<sub>L</sub>-homoserine lactone (Sigma).

25

26

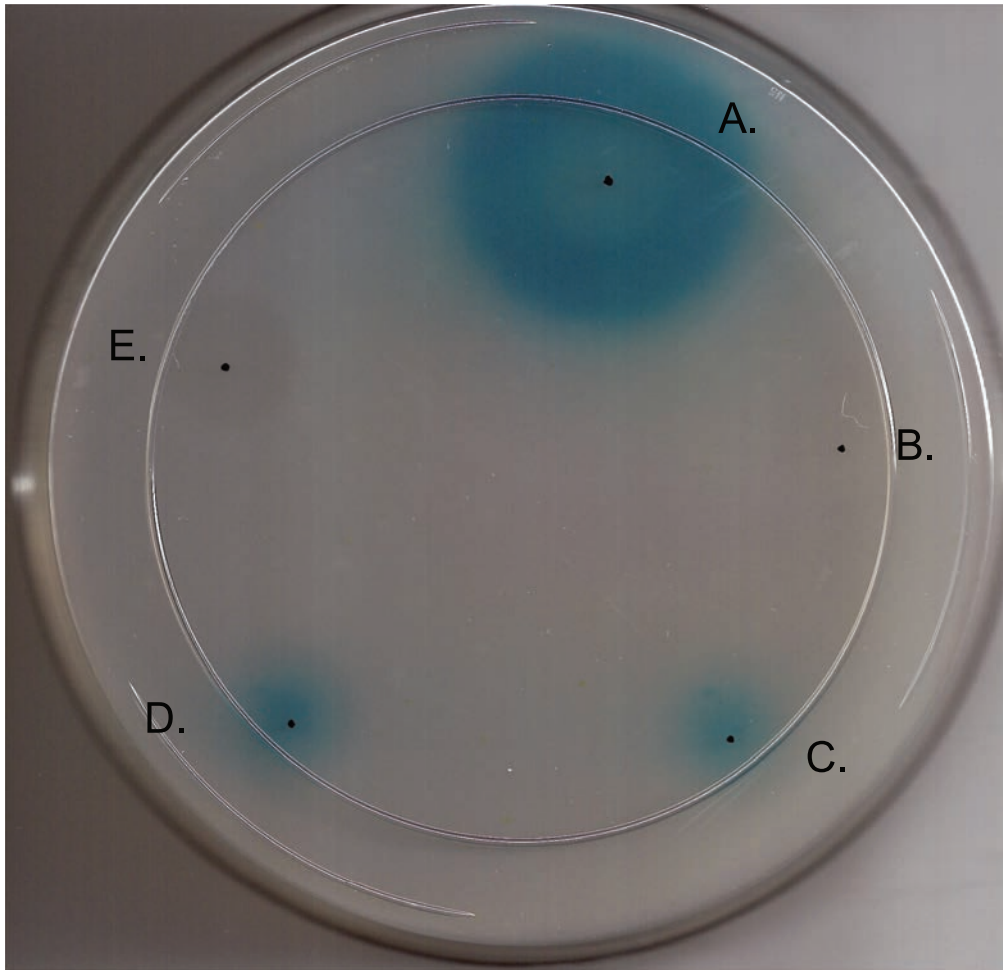

27

28

29 **Figure S3.** Cosmid clones of pAoF64/95 with inserts that contain *traI* code for production of an  
30 acyl-HSL. Overnight cultures of NTL4 harboring cosmid clones of pAoF64/96 that overlap the  
31 *traI/trb* region were grown in LB. The cells were removed by centrifugation and 40  $\mu$ l of the  
32 culture supernatants were spotted directly onto the surface of a soft agar layer of AB medium  
33 supplemented with mannitol and X-gal containing the indicator strain, NTL4(pRKLH4141) (1).  
34 Supernatants are from overnight cultures of: **A.** NTL4(pAoF64/95::*traM*pVik107), an AAI  
35 overproducing strain; **B.** NTL4(pMWS109), (*traI*); **C.** NTL4(pMWS106), (*traI*<sup>+</sup>); **D.**  
36 NTL4(pMWS110), (*traI*<sup>+</sup>); and **E.** NTL4.

37

38

## Reference

39

- 40 1. **Luo Z-Q, Smyth AJ, Gao P, Qin Y, Farrand SK.** 2003. Mutational analysis of TraR:  
41 correlating function with molecular structure of a quorum-sensing transcriptional  
42 activator. *J. Biol. Chem.* **278**:13173-13182.

43
